# Supplementary material for: A supramolecular assembling of zinc porphyrin with a π-conjugated oligo(phenylenevinylene) (oPPV) molecular wire for dye sensitized solar cell
Source: Royal Society of Chemistry journal article supplement (doi:10.1039/c5ra16394c), 2015-01-01
Supplement: c5ra16394c1.pdf [file c5ra16394c1.pdf]

## Supporting Information

For

### **A supramolecular assembling of Zinc porphyrin with a $\pi$ -conjugated oligophenylenevinylene (oPPV) molecular wire for dye sensitized solar cell**

A. Charisiadis<sup>1</sup>, C. Stangel<sup>1</sup>, V. Nikolaou<sup>1</sup>, M. S. Roy<sup>2</sup>, G. D. Sharma<sup>3</sup>, A. G. Coutsolelos<sup>1\*</sup>

<sup>1</sup>Department of Chemistry, University of Crete, Laboratory of Bioinorganic Chemistry, Voutes Campus, P.O. Box 2208, 71003 Heraklion, Crete, Greece

<sup>2</sup>Defence Laboratory, Jodhpur (Raj.) 342011, India

<sup>3</sup>R & D Centre for Engineering and Science  
JEC group of colleges, Jaipur Engineering College campus  
Kukas, Jaipur (Raj.) 303101, India

\* Corresponding authors

G. D. Sharma [gdsharma273@gmail.com](mailto:gdsharma273@gmail.com)

A. G. Coutsolelos [acoutsol@uoc.gr](mailto:acoutsol@uoc.gr)

## Table of contents

|                                                                                                           |     |
|-----------------------------------------------------------------------------------------------------------|-----|
| Figure S1a. $^1\text{H}$ NMR spectrum in $\text{CDCl}_3$ of compound <b>LC</b> .....                      | S-3 |
| Figure S1b. Focus on aromatic region of $^1\text{H}$ NMR spectrum of <b>LC</b> .....                      | S-3 |
| Figure S2a. $^{13}\text{C}$ NMR spectrum in $\text{CDCl}_3$ of compound <b>LC</b> .....                   | S-4 |
| Figure S2b. $^{13}\text{C}$ NMR spectrum in $\text{CDCl}_3$ of compound <b>LC</b> .....                   | S-4 |
| Figure S3. Mass spectrum of compound <b>LC</b> .....                                                      | S-5 |
| Figure S4. Cyclic and square wave voltammograms of compound <b>LC</b> .....                               | S-5 |
| Figure S5. A different view perspective of the gas-phase geometry structure of <b>ZnTPP- LC</b> .....     | S-6 |
| Table S1. Coordinates of gas phase geometry optimized structure of <b>ZnTPP-LC</b> calculated by DFT..... | S-6 |

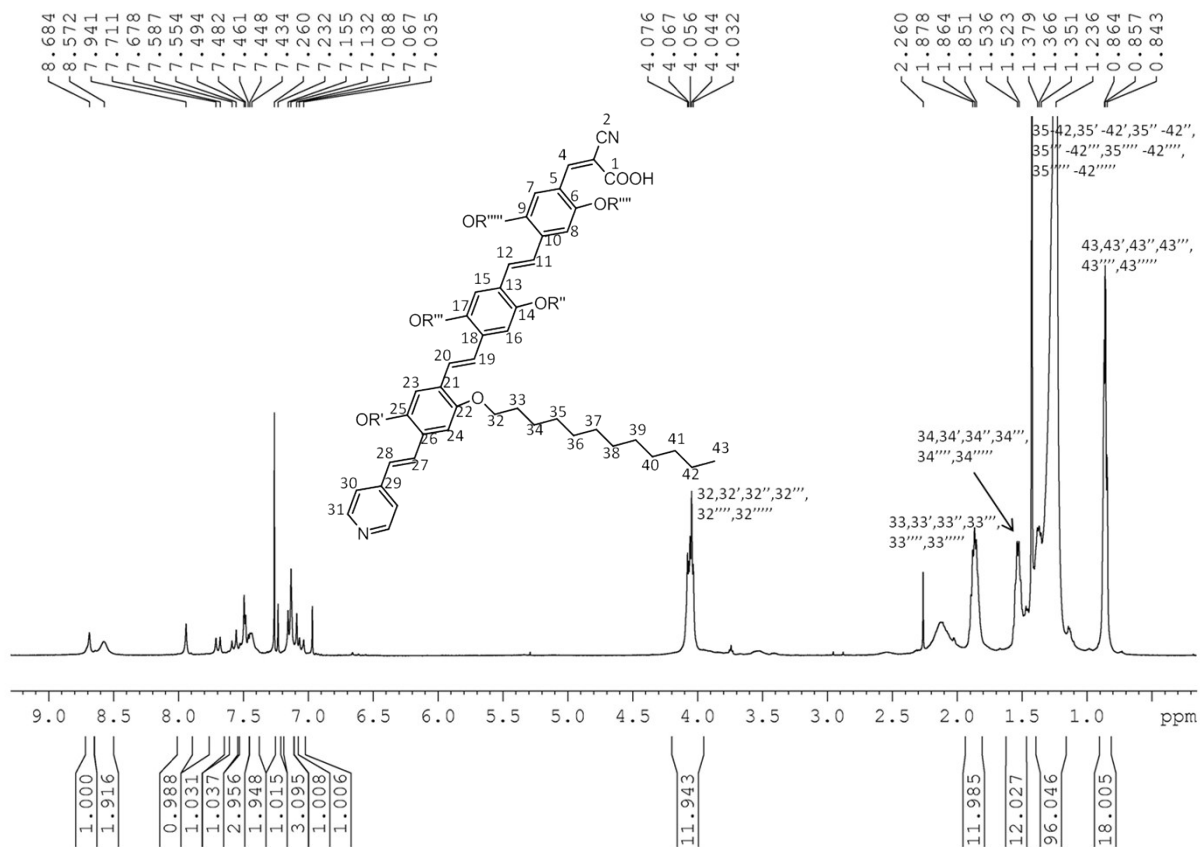

Figure S1a.  $^1\text{H}$  NMR spectrum of LC (500MHz,  $\text{CDCl}_3$ )

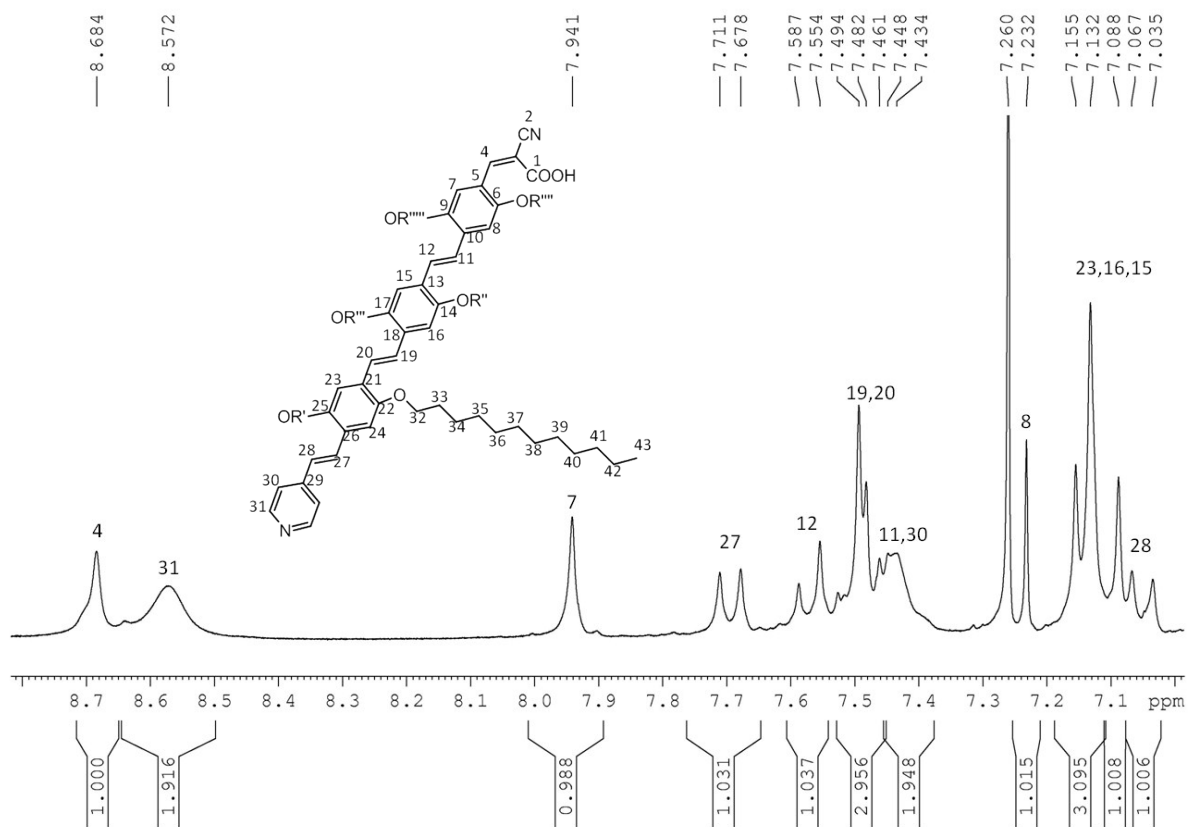

Figure S1b. Focus on aromatic region of  $^1\text{H}$  NMR of LC

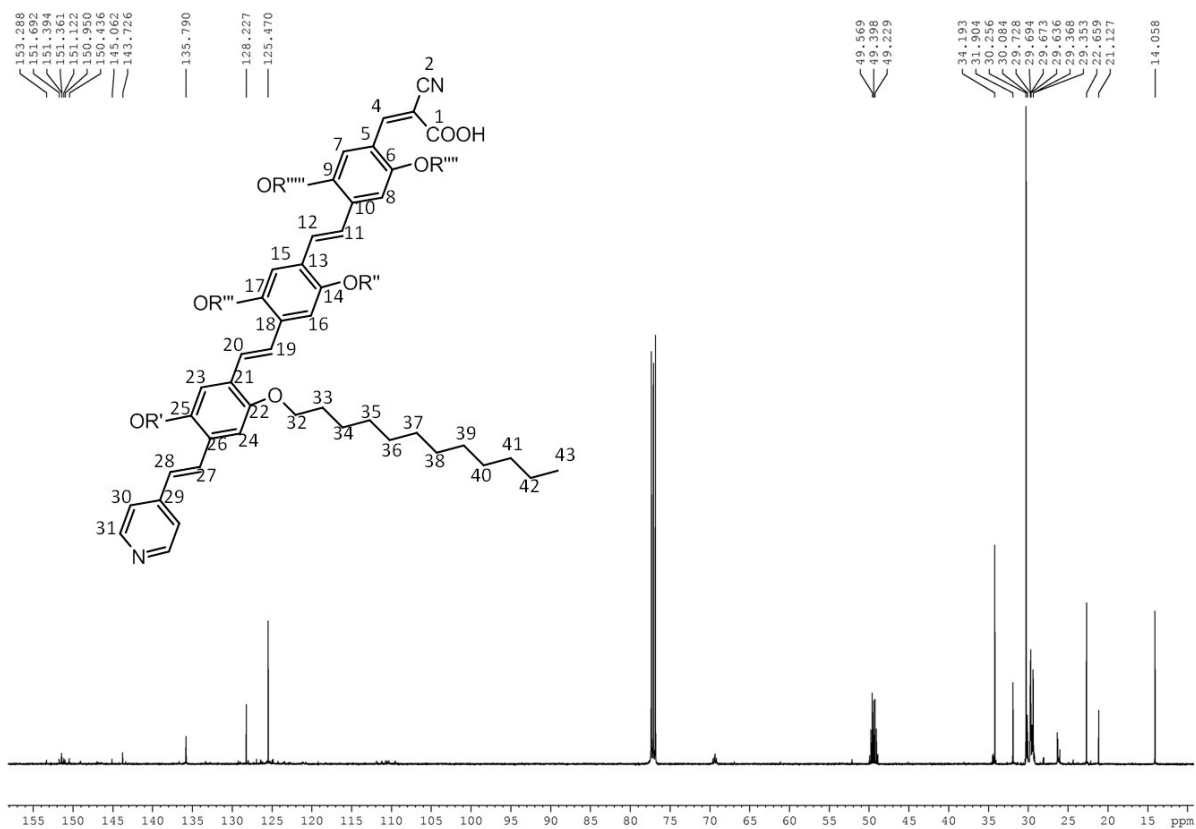

Figure S2a. <sup>13</sup>C NMR spectrum of LC (500MHz, CDCl<sub>3</sub>)

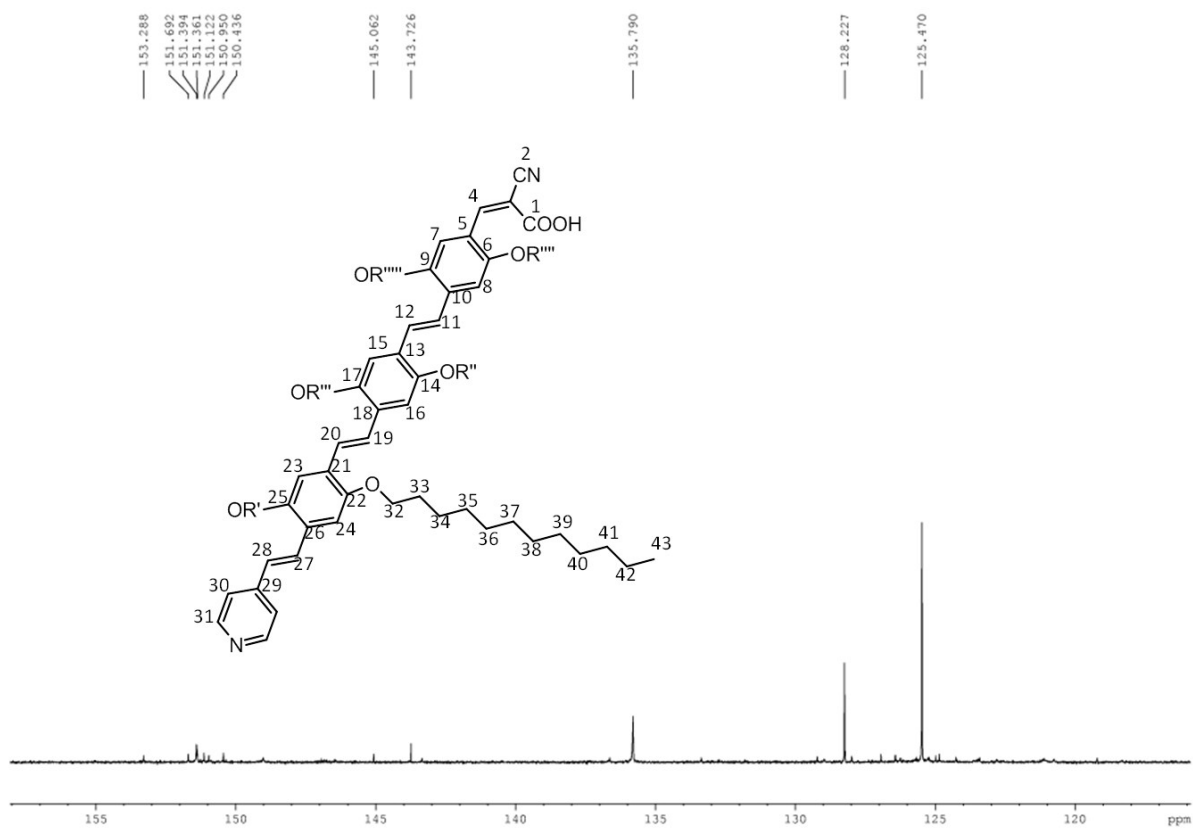

Figure S2b. <sup>13</sup>C NMR spectrum of LC (500MHz, CDCl<sub>3</sub>)

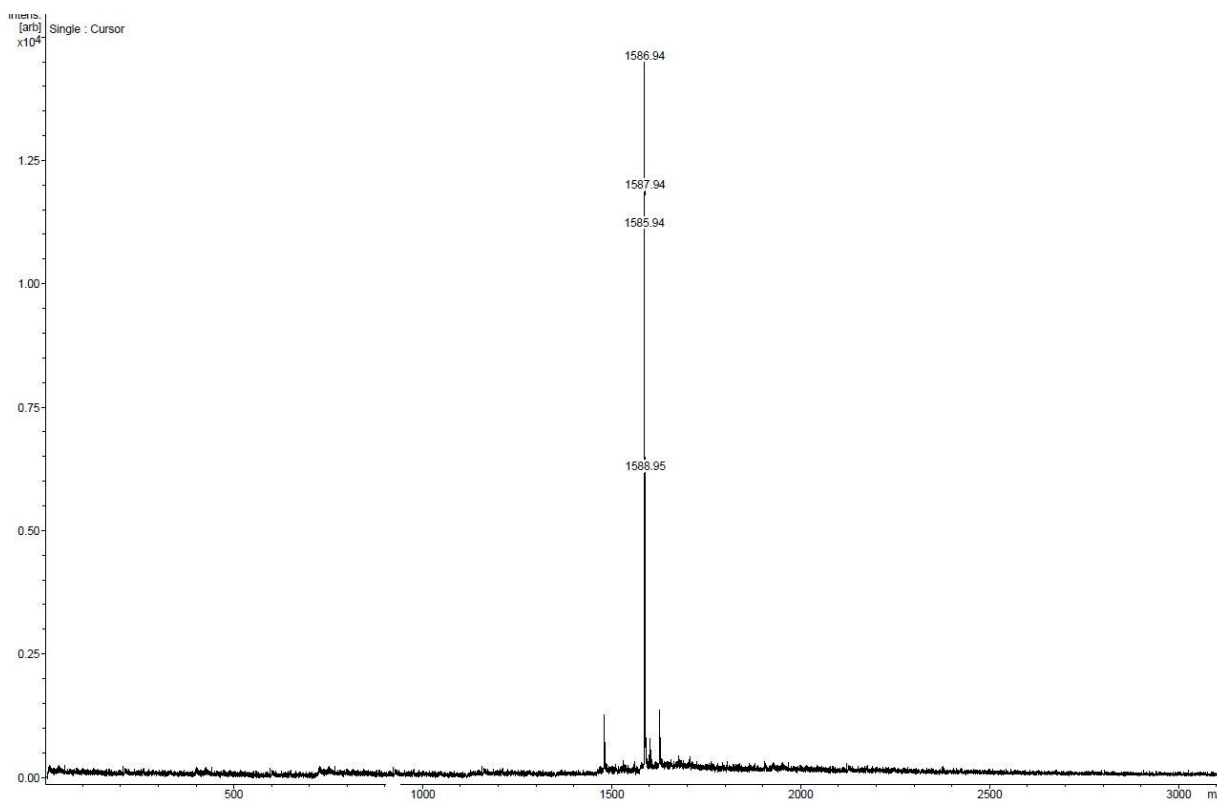

Figure S3. Mass spectrum of LC

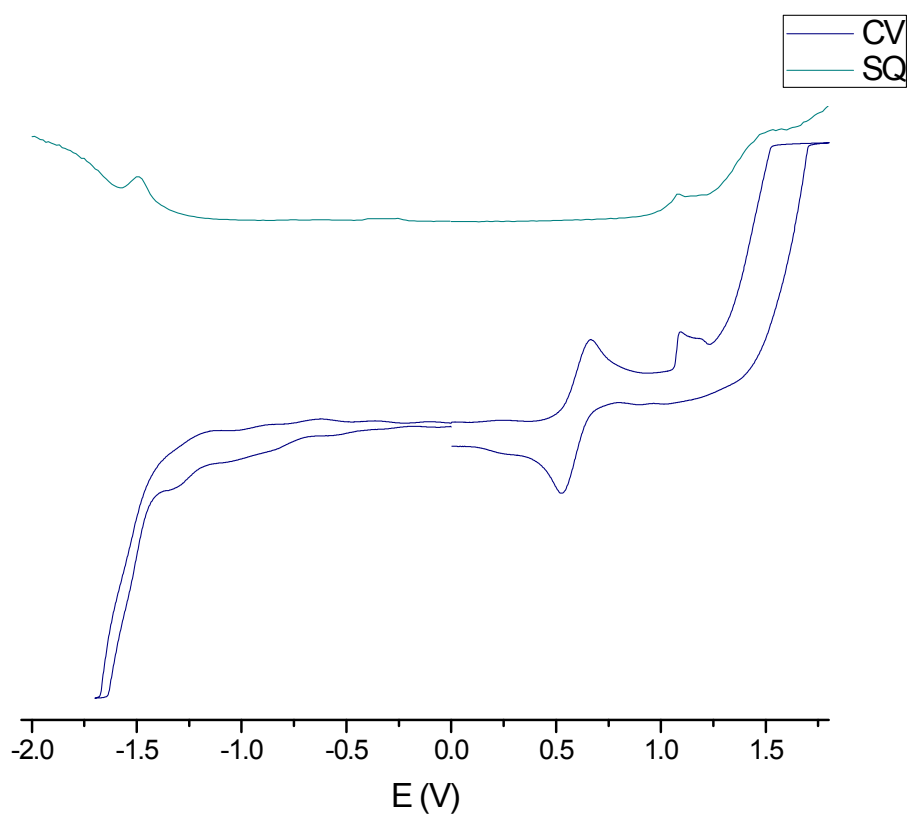

Figure S4. Cyclic and square wave voltammograms of LC

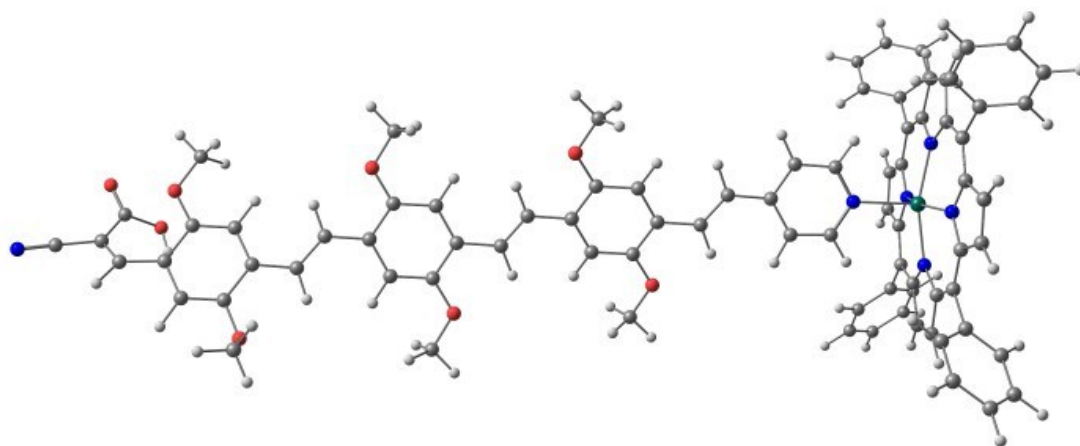

Figure S5: Different view perspective of the gas phase geometry optimized structure of **ZnTPP-LC**.

Table S1. Coordinates of gas phase geometry optimized structure of **ZnTPP-LC** calculated by DFT at the B3LYP / 6-31G(d) level.

E = - 4197.1729362 Hartree / particle.

|   |              |               |              |
|---|--------------|---------------|--------------|
| C | 6.393674000  | -13.341950000 | 0.438909000  |
| C | 6.125455000  | -13.564573000 | 1.756471000  |
| C | 4.818755000  | -12.998877000 | 2.026339000  |
| N | 4.318203000  | -12.447860000 | 0.872506000  |
| C | 5.245528000  | -12.655437000 | -0.118809000 |
| C | 2.588544000  | -10.795889000 | -3.612629000 |
| C | 3.823532000  | -11.346916000 | -3.454278000 |
| C | 3.968932000  | -11.665609000 | -2.046883000 |
| N | 2.821972000  | -11.314297000 | -1.382061000 |
| C | 1.957068000  | -10.787066000 | -2.306803000 |
| C | 5.106831000  | -12.276231000 | -1.473188000 |
| C | -1.612772000 | -10.088663000 | 0.774603000  |
| C | -1.354914000 | -9.891479000  | -0.549056000 |
| C | 0.010774000  | -10.315494000 | -0.784402000 |
| N | 0.554342000  | -10.762678000 | 0.394697000  |

|   |              |               |              |
|---|--------------|---------------|--------------|
| C | -0.414496000 | -10.654211000 | 1.361766000  |
| C | 0.654751000  | -10.305834000 | -2.042728000 |
| C | 2.180898000  | -12.662146000 | 4.819282000  |
| C | 0.948254000  | -12.105420000 | 4.662433000  |
| C | 0.858546000  | -11.652946000 | 3.287532000  |
| N | 2.028238000  | -11.949842000 | 2.635803000  |
| C | 2.853842000  | -12.571611000 | 3.537615000  |
| C | 4.156571000  | -13.051826000 | 3.274026000  |
| C | -0.279004000 | -11.040983000 | 2.714338000  |
| C | -0.125482000 | -9.761658000  | -3.202215000 |
| C | -1.455382000 | -10.809185000 | 3.615567000  |
| C | 4.890973000  | -13.703404000 | 4.407852000  |
| C | 6.256973000  | -12.572050000 | -2.389718000 |
| C | -1.403536000 | -9.835411000  | 4.625653000  |
| C | -2.495637000 | -9.617881000  | 5.467556000  |
| C | -3.661031000 | -10.371689000 | 5.314510000  |
| C | -3.725383000 | -11.345153000 | 4.315342000  |
| C | -2.632287000 | -11.561919000 | 3.474580000  |
| C | -0.415431000 | -8.390934000  | -3.292723000 |
| C | -1.144660000 | -7.882005000  | -4.368672000 |
| C | -1.598349000 | -8.736322000  | -5.375673000 |
| C | -1.317985000 | -10.102167000 | -5.298053000 |
| C | -0.588908000 | -10.609421000 | -4.221205000 |
| C | 6.011072000  | -13.088052000 | 4.988988000  |
| C | 6.696180000  | -13.695407000 | 6.042749000  |
| C | 6.272837000  | -14.931454000 | 6.535432000  |
| C | 5.160901000  | -15.555540000 | 5.966029000  |

|    |              |               |              |
|----|--------------|---------------|--------------|
| C  | 4.477449000  | -14.947109000 | 4.912038000  |
| C  | 7.045890000  | -11.532520000 | -2.907358000 |
| C  | 8.116176000  | -11.802827000 | -3.761905000 |
| C  | 8.417106000  | -13.119889000 | -4.114934000 |
| C  | 7.639265000  | -14.163418000 | -3.608910000 |
| C  | 6.568927000  | -13.891431000 | -2.755011000 |
| Zn | 2.565953000  | -11.294090000 | 0.708749000  |
| C  | 10.165878000 | 13.968685000  | 3.569934000  |
| C  | 9.667093000  | 12.599438000  | 3.454131000  |
| C  | 8.317460000  | 12.353446000  | 3.766548000  |
| C  | 7.758838000  | 11.086330000  | 3.676434000  |
| C  | 8.547809000  | 9.976469000   | 3.289102000  |
| C  | 9.911334000  | 10.209638000  | 3.016812000  |
| C  | 10.477071000 | 11.478472000  | 3.114069000  |
| C  | 7.925393000  | 8.663010000   | 3.172184000  |
| C  | 8.579281000  | 7.482627000   | 3.052601000  |
| C  | 7.971568000  | 6.169227000   | 2.889891000  |
| C  | 6.602369000  | 5.990634000   | 2.615454000  |
| C  | 6.041058000  | 4.728721000   | 2.457104000  |
| C  | 6.847600000  | 3.563324000   | 2.562268000  |
| C  | 8.218285000  | 3.743652000   | 2.824261000  |
| C  | 8.779150000  | 5.006070000   | 2.989070000  |
| C  | 6.239923000  | 2.251274000   | 2.379521000  |
| C  | 6.841254000  | 1.053416000   | 2.578042000  |
| C  | 6.239926000  | -0.256868000  | 2.361382000  |
| C  | 4.985773000  | -0.431318000  | 1.748668000  |
| C  | 4.429809000  | -1.691099000  | 1.548096000  |



|   |              |              |             |
|---|--------------|--------------|-------------|
| C | 5.130906000  | -2.856773000 | 1.952825000 |
| C | 6.385165000  | -2.683526000 | 2.568142000 |
| C | 6.938427000  | -1.424662000 | 2.771609000 |
| C | 4.536347000  | -4.166059000 | 1.720944000 |
| C | 5.134543000  | -5.369245000 | 1.881427000 |
| C | 4.514772000  | -6.669899000 | 1.642121000 |
| C | 3.153264000  | -6.855128000 | 1.327869000 |
| C | 2.664529000  | -8.133270000 | 1.102833000 |
| N | 3.428088000  | -9.239748000 | 1.170958000 |
| C | 4.725839000  | -9.080295000 | 1.478172000 |
| C | 5.297546000  | -7.837625000 | 1.719267000 |
| O | 11.794350000 | 11.733777000 | 2.927514000 |
| O | 6.412531000  | 10.921571000 | 3.936961000 |
| O | 10.105910000 | 5.216833000  | 3.249043000 |
| O | 4.714937000  | 4.518732000  | 2.190148000 |
| O | 8.151181000  | -1.217860000 | 3.372251000 |
| O | 3.217000000  | -1.896365000 | 0.951416000 |
| C | 11.119596000 | 14.619877000 | 2.848740000 |
| C | 6.099697000  | 10.705519000 | 5.314571000 |
| C | 12.646711000 | 10.716977000 | 2.412830000 |
| C | 10.968477000 | 4.095557000  | 3.344118000 |
| C | 3.862751000  | 5.642635000  | 2.051562000 |
| C | 2.463418000  | -0.771683000 | 0.529227000 |
| C | 8.897519000  | -2.342667000 | 3.803231000 |
| C | 11.486517000 | 15.946338000 | 3.243642000 |
| N | 11.760433000 | 17.029642000 | 3.569226000 |
| C | 11.855852000 | 14.100807000 | 1.635791000 |

|   |              |               |              |
|---|--------------|---------------|--------------|
| O | 13.018867000 | 14.330280000  | 1.421775000  |
| O | 11.105439000 | 13.414260000  | 0.738680000  |
| H | -0.498762000 | -9.245590000  | 4.745266000  |
| H | -2.436088000 | -8.856840000  | 6.241530000  |
| H | -4.511645000 | -10.203226000 | 5.969705000  |
| H | -4.625747000 | -11.941639000 | 4.192246000  |
| H | -2.682242000 | -12.325167000 | 2.702990000  |
| H | 3.616752000  | -15.437981000 | 4.466416000  |
| H | 6.339693000  | -12.123556000 | 4.611486000  |
| H | 4.826652000  | -16.520381000 | 6.338755000  |
| H | 7.558780000  | -13.200083000 | 6.481339000  |
| H | 6.805661000  | -15.404880000 | 7.355890000  |
| H | 5.960808000  | -14.704663000 | -2.368627000 |
| H | 7.861580000  | -15.191638000 | -3.882672000 |
| H | 9.250001000  | -13.331349000 | -4.780347000 |
| H | 8.716425000  | -10.983547000 | -4.149521000 |
| H | 6.815353000  | -10.506884000 | -2.632173000 |
| H | 7.279230000  | -13.630531000 | -0.108750000 |
| H | 6.748099000  | -14.075866000 | 2.476485000  |
| H | 2.594164000  | -13.101862000 | 5.715434000  |
| H | 0.167714000  | -12.016334000 | 5.404183000  |
| H | -2.533951000 | -9.885512000  | 1.301341000  |
| H | -2.030197000 | -9.507344000  | -1.300035000 |
| H | 2.141490000  | -10.436941000 | -4.528346000 |
| H | 4.565290000  | -11.529039000 | -4.218514000 |
| H | -0.059166000 | -7.722868000  | -2.513312000 |
| H | -0.377982000 | -11.673394000 | -4.159588000 |

|   |              |               |              |
|---|--------------|---------------|--------------|
| H | -1.671122000 | -10.776306000 | -6.074192000 |
| H | -2.166322000 | -8.341160000  | -6.213785000 |
| H | -1.354850000 | -6.816727000  | -4.421595000 |
| H | 1.619531000  | -8.297899000  | 0.856861000  |
| H | 5.316031000  | -9.990873000  | 1.526161000  |
| H | 2.472508000  | -6.013242000  | 1.262980000  |
| H | 6.354764000  | -7.772529000  | 1.960706000  |
| H | 6.918633000  | -3.563504000  | 2.903848000  |
| H | 4.452598000  | 0.448113000   | 1.412098000  |
| H | 7.861486000  | 1.021670000   | 2.945704000  |
| H | 5.201204000  | 2.281025000   | 2.067702000  |
| H | 3.511903000  | -4.134705000  | 1.364264000  |
| H | 6.177291000  | -5.415693000  | 2.190255000  |
| H | 8.848366000  | 2.865918000   | 2.885661000  |
| H | 5.981646000  | 6.871165000   | 2.509819000  |
| H | 6.839956000  | 8.682257000   | 3.201177000  |
| H | 9.663834000  | 7.471478000   | 3.098197000  |
| H | 7.675494000  | 13.181780000  | 4.053955000  |
| H | 10.532088000 | 9.374830000   | 2.717132000  |
| H | 9.683359000  | 14.556753000  | 4.349372000  |
| H | 8.356427000  | -2.917918000  | 4.566228000  |
| H | 9.152543000  | -3.004710000  | 2.964830000  |
| H | 9.815598000  | -1.943686000  | 4.238664000  |
| H | 2.215092000  | -0.112820000  | 1.371683000  |
| H | 2.996904000  | -0.194251000  | -0.237074000 |
| H | 1.543095000  | -1.173415000  | 0.101514000  |
| H | 10.671702000 | 3.427382000   | 4.163144000  |

|   |              |              |             |
|---|--------------|--------------|-------------|
| H | 11.961274000 | 4.499494000  | 3.550958000 |
| H | 10.997026000 | 3.526438000  | 2.405551000 |
| H | 4.174140000  | 6.286426000  | 1.218267000 |
| H | 3.826576000  | 6.238160000  | 2.973454000 |
| H | 2.869148000  | 5.240762000  | 1.844385000 |
| H | 12.275251000 | 10.341002000 | 1.452453000 |
| H | 12.748887000 | 9.887609000  | 3.123663000 |
| H | 13.613442000 | 11.199139000 | 2.265431000 |
| H | 6.424128000  | 11.552623000 | 5.933098000 |
| H | 6.570817000  | 9.787620000  | 5.690010000 |
| H | 5.013127000  | 10.609357000 | 5.373494000 |
| H | 10.190770000 | 13.332202000 | 1.059154000 |
